# Supplementary material for: Horses in Denmark Are a Reservoir of Diverse Clones of Methicillin-Resistant and -Susceptible Staphylococcus aureus
Source: Front Microbiol. 2017 Apr 3;8:543. doi: 10.3389/fmicb.2017.00543 (PMC5376617; doi:10.3389/fmicb.2017.00543)
Supplement: Data Sheet 2 — Summary table of resistance profiles obtained from Mykrobe Predictor including responsible genes/variants found. [file DataSheet2.XLSX]

## Sheet: sum_wide
name	S_Ciprofloxacin	S_Clindamycin	S_Erythromycin	S_FusidicAcid	S_Gentamicin	S_Methicillin	S_Mupirocin	S_Penicillin	S_Rifampicin	S_Tetracycline	S_Trimethoprim	S_Vancomycin	G_aacAaphD	G_blaZ	G_dfrA	G_dfrC	G_dfrG	G_dfrK	G_ermA	G_ermB	G_ermC	G_ermT	G_lnuB	G_mecA	G_tetK	G_tetL	G_tetM	G_vgaA	G_vgaALC	V_gyrA_S84L-TCA7254TTA	V_rpoB_H481N-CAT592271AAT
Case A	R	R	S	S	S	R	S	R	S	R	R	S		100_44			100_55						98_70	99_65	100_56		97_68			94_0_99999994
Case B	R	R	S	S	S	R	S	R	S	R	R	S		100_42			100_52						98_49	98_49	100_48		97_53			53_0_99999994
Case C	R	R	R	S	S	R	S	R	S	R	R	S		100_29			100_50				98_419		98_51	98_45	100_39		97_44			64_0_99999995
Case D	S	S	S	S	r	R	S	R	S	R	R	S	100_18	95_14				68_58						100_83			97_129
Case E	S	S	S	S	r	R	S	R	S	R	R	S	100_21	95_26				67_74						100_97			97_122
Case F	S	R	R	S	S	R	S	R	S	R	R	S		100_29			100_48				100_3454		98_111	99_93	100_59		97_120
Case G	S	S	S	S	S	R	S	R	S	R	R	S		100_19			100_51							100_72			97_81
Case H	S	R	R	S	S	R	S	R	S	R	R	S		100_39			100_60				99_3670		98_103	99_119	100_53		97_149
Case I	S	S	S	S	r	R	S	R	S	R	R	S	100_23	94_18				68_57						100_92			97_157
Case J	S	R	S	S	S	R	S	R	S	R	R	S		100_32			100_72						98_136	99_102	100_51		97_148
Case K	S	R	S	S	S	R	S	R	S	R	R	S		99_21			100_80						98_144	99_121	100_54		97_149
55-100-009	S	R	S	S	S	R	S	R	S	R	R	S		100_45			100_75						98_127	99_119	100_65		97_150
55-100-016	S	R	R	S	S	R	S	R	S	R	S	S		94_11					97_620	95_614			98_63	100_54	100_38		97_69
55-100-026	S	R	S	S	S	R	S	R	S	R	R	S		95_25			100_54						98_64	100_68	100_36		97_81
55-100-042	R	R	S	S	S	R	S	R	S	R	R	S		100_32			100_50						98_134	98_79	100_31		97_123			143_0_99999993
55-100-056	S	R	R	S	S	R	S	R	S	R	S	S		96_26					97_788	95_757			98_152	100_110	100_45		97_150
55-100-067	S	R	R	S	S	R	S	R	S	R	R	S		100_9			100_16		97_111	95_108			98_39	100_35	100_18		97_55
55-100-073	R	r	S	S	S	R	S	R	S	R	R	S		100_25			100_40						98_11	98_54	100_35		97_73			107_0_99999991
55-100-079	S	R	S	S	S	R	S	R	S	R	R	S		100_9			100_24						98_22	99_24	100_15
55-100-080	S	R	R	S	S	R	S	R	S	R	S	S		95_16					97_436	96_428			98_43	100_40	100_19		97_59
55-100-081	R	R	S	S	S	R	S	R	S	R	R	S		100_16			100_30						98_46	98_43	100_20		97_64			82_0_99999993
55-100-087	R	R	S	S	S	R	S	R	S	R	R	S		100_5			100_22						98_31	98_19	100_13		97_31			48_0_99999994
55-100-096	R	R	S	S	S	R	S	R	S	R	R	S		100_30			100_64						98_85	98_82	100_50		97_103			178_0_99999977
55-100-124	S	R	S	S	S	R	S	R	S	R	R	S		100_40			100_61						98_86	99_93	100_59		97_130
55-100-132	S	R	R	S	S	R	S	R	S	R	R	S		94_14			100_47				100_1784		98_74	100_55	100_28		97_89
55-100-133	S	R	S	S	S	R	S	R	S	R	R	S		100_14			100_24						98_48	99_46	100_24		97_56
55-100-137	R	R	R	S	S	R	S	R	S	R	R	S		100_15			100_43				99_1662		98_54	98_37	100_20		97_43			80_0_99999992
Aureus_56	S	S	S	S	r	R	S	R	S	R	S	S	99_5	94_5										100_11	100_8		97_17
SW356	S	S	S	S	S	S	S	S	S	R	S	S															97_66
USA42	S	R	R	S	S	S	S	R	S	R	S	S		100_159					99_113								97_124
1953	S	R	R	S	S	S	S	R	S	S	S	S		100_69								88_55
2046	S	R	R	S	S	S	S	R	S	S	S	S		91_56								87_57
47771	S	S	S	S	S	R	S	R	S	R	S	S		99_106										100_163			97_162
50148	R	R	R	S	S	R	S	R	S	S	S	S		100_649							99_1683			100_116						189_0_99999983
51225	S	S	S	S	S	R	S	R	S	R	S	S		98_76										100_103	100_94		97_96
51726	R	R	R	S	S	R	S	R	S	S	S	S		100_646							98_1431			100_116						173_0_99999985
55488	S	S	S	S	S	R	S	R	S	R	R	S		95_35			100_41							100_60	100_48		97_53
60036	S	R	R	S	S	R	S	R	S	R	R	S		98_61			96_69				100_743			100_92			97_82
61888	S	S	S	S	S	R	S	R	S	R	S	S		100_7										99_113			97_88
62951	S	R	S	S	S	S	S	R	S	S	R	S		100_97			100_106						98_127
AV4	S	R	R	S	R	R	S	R	S	R	R	S	100_63	100_58				87_55				99_647		100_63		99_542	97_65
AV6	S	S	S	S	S	R	S	R	S	R	S	S		91_6										100_12			97_17
LY19990171	S	R	R	S	S	S	S	S	S	S	S	S										89_130
P23-10_WZ-103	S	S	S	S	S	S	S	R	R	S	R	S		100_586			100_126														213_4_325
P23-11_HF-446	S	R	R	S	S	S	S	S	S	S	S	S									100_4576
P23-12_HF-80520	R	R	R	S	R	S	S	R	S	R	S	S	99_112	100_74						96_154						98_176				247_0_99999981
P23-13_HF-724402	R	R	R	S	R	S	S	R	S	R	S	S	99_108	100_88						96_148						99_163				246_0_99999980
P23-9_WZ-1	S	R	R	S	R	S	S	R	R	R	S	S	100_74	100_680							100_6560				99_3866						172_4_259
ST20071083	S	R	R	S	S	S	S	S	S	S	S	S										89_159
ST20082015	S	R	R	S	S	S	S	S	S	S	S	S										89_106
ST20090121	S	R	R	S	S	S	S	R	S	S	S	S		92_119								88_131
ST20091155	S	R	R	S	S	S	S	S	S	S	S	S										88_108
ST20091526	S	R	R	S	S	S	S	S	S	S	S	S										88_141
ST20091826	S	R	R	S	S	S	S	S	S	S	S	S										90_149
ST20100011	S	R	R	S	S	S	S	S	S	S	S	S										90_119
ST20100537	S	R	R	S	S	S	S	R	S	S	S	S		100_233							99_990
ST20101526	S	R	R	S	S	S	S	R	S	R	R	S		95_80				100_100	98_88							99_93	97_98
H002	S	S	S	S	r	R	S	R	S	R	R	S	100_17	94_10				66_49						100_85			97_110
H042	S	S	S	S	r	R	S	R	S	R	R	S	100_22	94_17				66_42						100_82			97_100
H043	S	S	S	S	r	R	S	R	S	R	R	S	100_27	94_20				67_59						100_86			97_97
H044	S	S	S	S	r	R	S	R	S	R	R	S	100_14	94_14				67_40						100_52			97_71
H046	S	S	S	S	r	R	S	R	S	R	R	S	100_24	94_24				67_37						100_89			97_107
H155	S	S	S	S	r	R	S	R	S	R	R	S	100_26	94_22				67_44						100_80			97_100
H157	S	S	S	S	r	R	S	R	S	R	R	S	100_17	94_23				67_57						100_89			97_137
H160	S	S	S	S	r	R	S	R	S	R	R	S	100_22	93_17				67_72						100_100			97_106
H161	S	S	S	S	r	R	S	R	S	R	R	S	100_20	95_14				68_56						100_67			97_85
H163	S	S	S	S	r	R	S	R	S	R	R	S	100_12	93_7				68_31						100_46			97_75
H223	S	R	S	S	S	R	S	R	S	R	R	S		100_16			100_35						98_73	99_62	100_36		97_78
H224	S	R	S	S	S	R	S	R	S	R	R	S		100_20			100_29						98_57	99_57	100_24		97_58
H280	S	R	S	S	S	R	S	R	S	R	R	S		100_25			100_45						98_79	100_67			97_89
H285	S	R	S	S	S	R	S	R	S	R	R	S		100_23			100_39						98_71	99_59			97_71
089B_2	R	R	R	S	S	R	S	R	S	R	R	S		98_56			100_77		100_163	100_163	97_28			100_91	100_78		97_83			129_0_99999991
09-01691-3	S	S	S	S	S	S	S	R	S	R	R	S		100_52			100_67										97_80
1061	S	R	R	S	S	S	S	R	S	R	S	S		96_43					97_47								97_56
12152-5	S	S	S	S	S	R	S	R	S	R	R	S		100_73	100_159	88_157								100_119			97_107
13349_2	R	S	S	S	S	R	S	R	S	R	S	S		96_70										100_103			97_72			70_0_99999995
13349_6	R	R	R	S	R	R	S	R	S	R	r	S	99_17	94_6				100_10	97_21	95_20				100_16		99_22	97_23			85_0_99999981
199-08	S	S	S	S	S	R	S	R	S	R	R	S		96_83				100_240						100_131	100_129	99_222	97_83
2007-70-91-4-SPA	S	R	R	S	S	R	S	R	S	R	R	S		100_42			100_64				98_30			100_83	100_87		97_67
2007-70-92-6-SPA	S	R	R	S	S	r	S	R	S	R	R	S		100_59			100_53				98_54			99_4	100_26		97_45	76_7	77_7
2007-70-95-9-SPA	S	R	R	S	S	S	S	R	S	R	R	S		94_46			100_59				97_585						97_61
2008-60-1662-5	S	R	R	S	S	R	S	R	S	R	R	S		100_63			100_68				98_110			100_108	100_153		97_75	76_15	77_15
2008-60-3254	S	S	S	S	S	R	S	R	S	R	R	S		100_55			100_76							100_100	100_86		97_96
2008-60-970	S	S	S	S	S	R	S	R	S	R	R	S		100_55			100_76							100_100	100_86		97_96
2296-MRSA	S	S	S	S	S	R	S	R	S	R	r	S		93_7			100_12							99_15	100_9		97_22
23225	S	R	R	S	S	R	S	R	S	R	S	S		100_72							98_20			100_75	100_90		97_75
23824	S	S	S	S	S	R	S	R	S	R	S	S		96_16										100_27	100_21		97_33
25207-25126-08	S	R	R	S	S	R	S	R	S	R	S	S		93_48					97_65					100_90			97_71
29139	S	R	R	S	R	R	S	R	S	R	R	S	100_46	97_47				67_47			98_817			100_68	100_99		97_58
3-S-1	S	S	S	S	S	R	S	R	S	R	R	S		96_187			100_200							100_268			97_223
30116	R	S	S	S	S	R	S	R	S	R	S	S		100_74										99_117			97_108			161_0_99999990
324	S	R	R	S	S	S	S	S	S	R	S	S							100_49								97_54
34-M-B-1_11	S	R	R	S	S	S	S	R	S	R	R	S		100_77			100_89				98_466						97_99
374-08	S	S	S	S	S	R	S	R	S	R	R	S		95_10				100_36						100_22	100_14	99_67	97_31
44523-1	S	R	S	S	S	R	S	R	S	R	R	S		100_61	100_141	87_140								100_105			97_91	96_2850	100_2984
6919-08_8	S	R	S	S	S	R	S	R	S	R	R	S		95_28				70_35						100_54	100_36		97_48	99_2750	100_2824
7_2007-70-77-4	S	S	S	S	S	R	S	R	S	R	S	S		94_6										100_14			97_18
7-1	S	R	S	S	S	R	S	R	S	R	S	S		99_72										100_438	99_140		97_371	99_6592	100_6728
7-109	S	R	S	S	S	R	S	R	S	R	S	S		98_70										100_114			97_102	99_6564	100_6700
7-12	S	S	S	S	S	R	S	R	S	R	S	S												99_122	99_91		97_98
7-14	S	S	S	S	S	R	S	R	S	R	S	S												99_132			97_116
7-3	S	S	S	S	S	R	S	R	S	R	S	S		100_76										100_129			97_99
7413532-2	S	S	S	S	S	S	S	r	S	R	S	S		99_6													97_19
7SPA_72-13850-1	S	R	R	S	S	S	S	S	S	R	R	S			100_136	86_131					90_56						97_28
9B	S	R	R	S	S	R	S	R	S	R	R	S		97_64			100_64				97_751			100_84	100_83		97_76
F10	S	R	R	S	S	S	S	R	S	R	S	S		100_157							98_112						97_43
F20	S	R	R	S	S	r	S	R	S	R	S	S		100_29							98_390			100_6			97_40
F38	S	S	S	S	S	S	S	R	S	R	S	S		100_114													97_25
M-5	S	S	S	S	S	R	S	R	S	R	S	S		93_5										99_15			97_17
M2009_10003479	S	R	R	S	S	R	S	R	S	R	S	S		97_42					100_61					100_83	100_60		97_71	100_3405	100_3461
M2009_10004208	S	R	R	S	R	R	S	R	S	R	R	S	100_54	100_54				69_57			100_3394			100_85			97_84	91_60	96_60
P23-01_SW31.1	S	R	R	S	S	R	S	R	S	R	S	S		100_43					100_52					100_54	100_47		97_55	78_687	79_694
P23-02_SW62.1	S	R	R	S	S	R	S	R	S	R	S	S		100_60					100_70		95_136			100_74	100_892		97_78	81_773	81_784
P23-03_SW181.1	S	R	R	S	S	R	S	R	S	R	S	S		100_56					100_60		93_1148			100_68	100_60		97_72
P23-14_SD4.1	R	R	R	S	R	S	S	R	S	R	S	S	99_78	100_61					97_105	95_104						99_104				150_0_99999990
PR7-08	S	R	S	S	S	R	S	R	S	R	S	S		95_113										100_145	100_140		97_105	95_440	99_442
SWK35	S	R	R	S	S	R	S	R	S	R	S	S		100_69					100_74					100_82	100_69		97_85
UB08116	S	S	S	S	S	R	S	R	S	R	R	S		100_43	100_98	87_97								100_79			97_57
UB08187	S	S	S	S	S	R	S	R	S	R	S	S		96_51										100_88	100_72		97_78
Veo08-01292-1	R	S	S	S	S	R	S	R	S	R	S	S		94_6										100_14	100_8		97_22			72_0_99999986
Veo8-003845st	S	R	S	S	S	R	S	R	S	R	S	S		95_49										100_86	100_74		97_65	92_507	100_513
DC38_BP_TET_F_7	S	S	S	S	S	S	S	R	S	R	S	S		100_470											100_1707		97_71
DC57_BP_GEN_I_7	S	S	S	S	S	S	S	R	S	R	S	S		100_217													97_71
T2	S	S	S	S	S	S	S	R	S	R	S	S		100_549													97_103
T3	S	S	S	S	S	S	S	R	S	R	S	S		100_255													97_49
T4	S	S	S	S	S	S	S	R	S	R	S	S		100_315													97_59
T5	S	S	S	S	S	S	S	R	S	R	S	S		100_257													97_44
T6	S	S	S	S	S	S	S	R	S	R	S	S		100_232													97_47
T7	S	S	S	S	S	S	S	R	S	R	S	S		100_185													97_38
Legend:		S_: Susceptibility (S, r, R)				G_: Tested genes (percent coverage _ depth)				V_: variants (alt depth _ wt depth _ conf)
